# Supplementary material for: Dual-enhancements of stability and wettability in O3-Na0.95Ni1/3Fe1/3Mn1/3O2 cathodes by converting surface residual alkali into ultrathin Na2Ti3O7 coatings
Source: Royal Society of Chemistry journal article supplement (doi:10.1039/d4nr05375c), 2025-01-01
Supplement: d4nr05375c1.pdf [file d4nr05375c1.pdf]

Electronic Supplementary Material (ESI) for Nanoscale

**Section S1** Details on the residual alkali titration method:

To ensure reliable data, the stirring time was determined based on changes in pH, and each sample was tested three times, with the average value reported. For titration, 5 g of NCA material and 20 mL of pure water were used in each test. Considering the alkaline nature of  $\text{Na}_2\text{CO}_3$  and  $\text{NaOH}$ , a two-step titration method was developed using 0.1 mol/L  $\text{HCl}$  with phenolphthalein and methyl red as indicators. The values in Figure 1b were calculated using Equations (1) and (2), where  $V_1$  (mL) represents the volume of  $\text{HCl}$  used in the first step with phenolphthalein,  $V_2$  (mL) is the total volume of  $\text{HCl}$  used in the two steps, and  $m$  (g) is the mass of the cathode material. Due to the high reactivity of sodium, residual alkali, formed from reactions with  $\text{H}_2\text{O}$  and  $\text{CO}_2$  in air, cannot be completely eliminated.

$$\text{NaCO}_3 \% = \frac{\frac{V_2 - V_1}{1000} \times C_{\text{HCl}} \times 105.99 \times 4}{m} \quad (1)$$

$$\text{NaOH} \% = \frac{\frac{2V_1 - V_2}{1000} \times C_{\text{HCl}} \times 39.997 \times 4}{m} \quad (2)$$

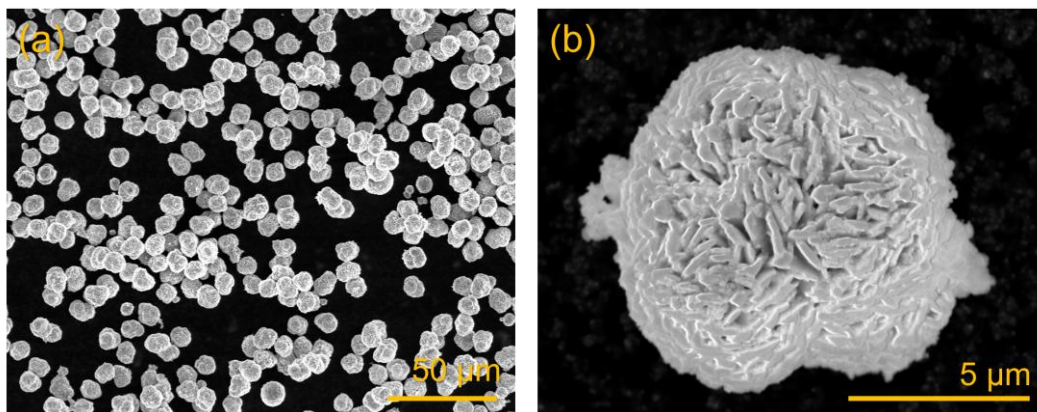

**Figure S1** SEM images of the NFM-P materials.

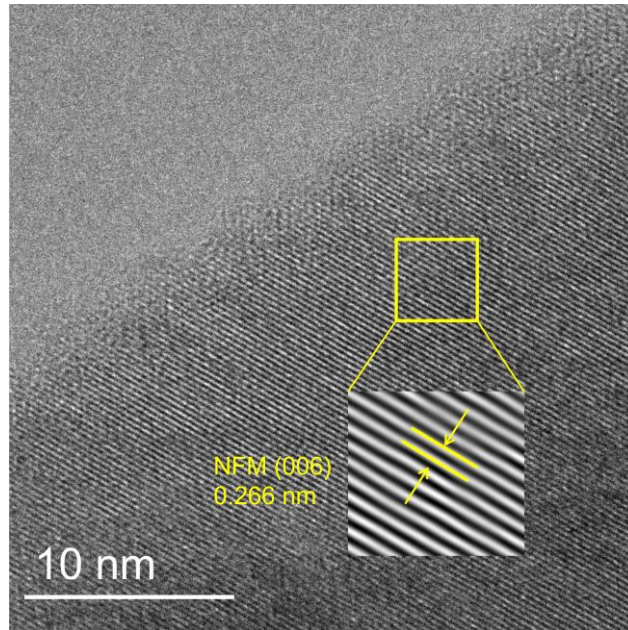

**Figure S2** HRTEM image of the NFM-P materials

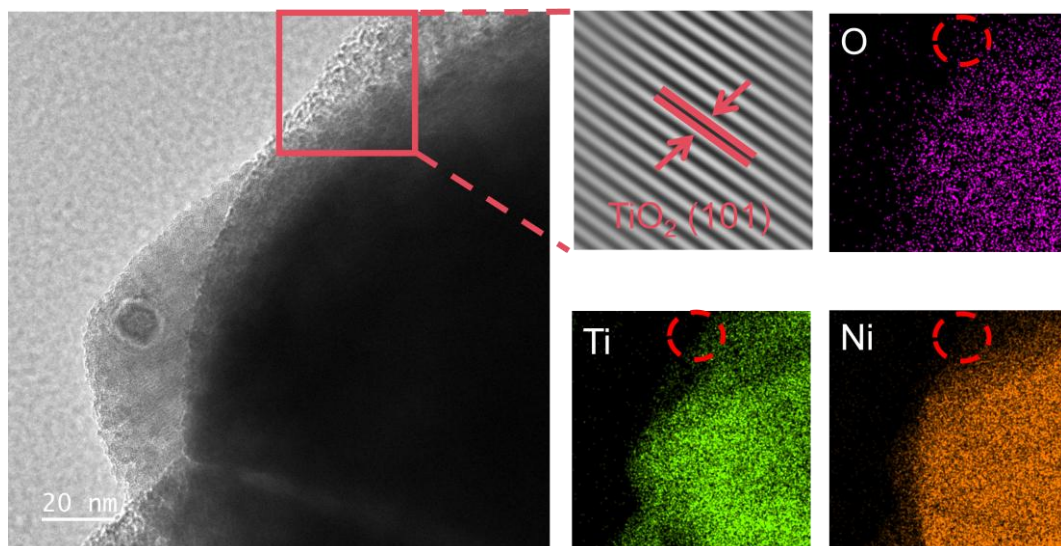

**Figure S3** The  $\text{TiO}_2$  regions observed in the TEM and EDS-Mapping images of the NFMT-B materials.

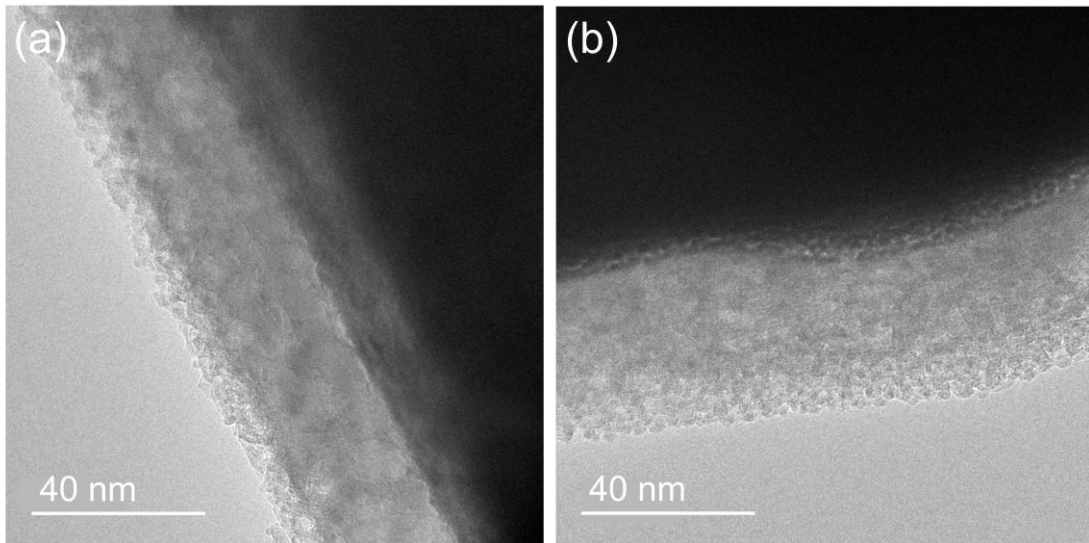

**Figure S4** HRTEM image of the NFMT-L materials

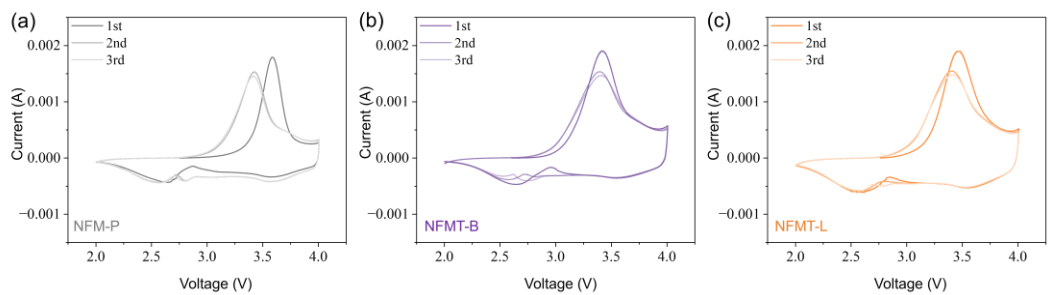

**Figure S5** Cyclic voltammetry (CV) curves for the first three cycles of three cathodes.

**Table S1** The Rietveld refinement XRD data of the NFM-P sample

|                            | <b>x</b> | <b>y</b> | <b>z</b> | <b>Occupancy</b> |
|----------------------------|----------|----------|----------|------------------|
| <b>Na</b>                  | 0        | 0        | 0.5      | 0.9553           |
| <b>Ni</b>                  | 0        | 0        | 0        | 0.3239           |
| <b>Fe</b>                  | 0        | 0        | 0        | 0.3318           |
| <b>Mn</b>                  | 0        | 0        | 0        | 0.3303           |
| <b>Ti</b>                  | 0        | 0        | 0        | 0                |
| <b>O</b>                   | 0        | 0        | 0.267    | 1.0571           |
| <b><math>R_{wp}</math></b> |          |          | 0.0676   |                  |

**Table S2** The Rietveld refinement XRD data of the NFMT-B sample.

|                              | <b>x</b> | <b>y</b> | <b>z</b> | <b>Occupancy</b> |
|------------------------------|----------|----------|----------|------------------|
| <b>Na</b>                    | 0        | 0        | 0.5      | 0.9513           |
| <b>Ni</b>                    | 0        | 0        | 0        | 0.3219           |
| <b>Fe</b>                    | 0        | 0        | 0        | 0.3310           |
| <b>Mn</b>                    | 0        | 0        | 0        | 0.3264           |
| <b>Ti</b>                    | 0        | 0        | 0        | 0.0012           |
| <b>O</b>                     | 0        | 0        | 0.267    | 1.0577           |
| <b><i>R</i><sub>wp</sub></b> |          |          | 0.0699   |                  |



**Table S3** The Rietveld refinement XRD data of the NFMT-L sample.

|                              | <b>x</b> | <b>y</b> | <b>z</b> | <b>Occupancy</b> |
|------------------------------|----------|----------|----------|------------------|
| <b>Na</b>                    | 0        | 0        | 0.5      | 0.9486           |
| <b>Ni</b>                    | 0        | 0        | 0        | 0.3233           |
| <b>Fe</b>                    | 0        | 0        | 0        | 0.3307           |
| <b>Mn</b>                    | 0        | 0        | 0        | 0.3295           |
| <b>Ti</b>                    | 0        | 0        | 0        | 0.0010           |
| <b>O</b>                     | 0        | 0        | 0.266    | 1.0577           |
| <b><i>R</i><sub>wp</sub></b> |          |          | 0.0597   |                  |

**Table S4**  $R_s$  and  $R_{ct}$  values of EIS fitting results

| $R$ ( $\Omega$ ) | NFM-P   | NFMT-B | NFMT-L |
|------------------|---------|--------|--------|
| $R_s$            | 5.893   | 5.625  | 5.474  |
| $R_{ct}$         | 1085.71 | 986    | 652.3  |
